# Supplementary material for: Ultra-high energy storage density and scale-up of antiferroelectric TiO2/ZrO2/TiO2 stacks for supercapacitors
Source: Royal Society of Chemistry journal article supplement (doi:10.1039/d0ta11991a), 2021-01-01
Supplement: d0ta11991a1.pdf [file d0ta11991a1.pdf]

## **Supplementary Information**

# **Ultra-high Energy Storage Density and Scale-up of Antiferroelectric TiO<sub>2</sub>/ZrO<sub>2</sub>/TiO<sub>2</sub> Stacks for Supercapacitors**

Sheng-Han Yi, Hsin-Chih Lin and Miin-Jang Chen\*

Department of Materials Science and Engineering, National Taiwan University,  
1, Roosevelt Road, Sec. 4, Taipei 106, Taiwan

\*Authors to whom any correspondence should be addressed.

E-mail: mjchen@ntu.edu.tw

### Doping concentration of Ti in the ZrO<sub>2</sub> layer

Since the doping of Ti in the TZT $n$  samples arises from the Ti diffusion from the TiO<sub>2</sub> interfacial layers or interlayers into ZrO<sub>2</sub>, a non-uniform doping profile is expected. The doping percentage of Ti in the ZrO<sub>2</sub> layer is investigated by an XPS depth profile analysis. Fig. S1(a) shows the depth profile of the chemical composition in the TZT2 sample. The O/[Zr+Ti] ratio in the ZrO<sub>2</sub> layer is in the range of 1.84~1.99, which is near the stoichiometry of the oxides. The depth profile of the Ti/[Zr+Ti] percentage is shown in Fig. S1(b), which reveals that the doping percentage of Ti in the ZrO<sub>2</sub> layer approximately ranges from 7.9 to 18.6% and the average doping percentage is around 13.7%.

The chemical composition of the sample was analyzed by an X-ray Photoelectron Spectroscopy (XPS, Thermo Fisher Scientific Theta Probe) with an Al K $\alpha$  X-ray source (1486.6 eV). Argon ions were used as the sputtering source for the depth profile analysis. The probing depth of the XPS is around 3~7 nm.

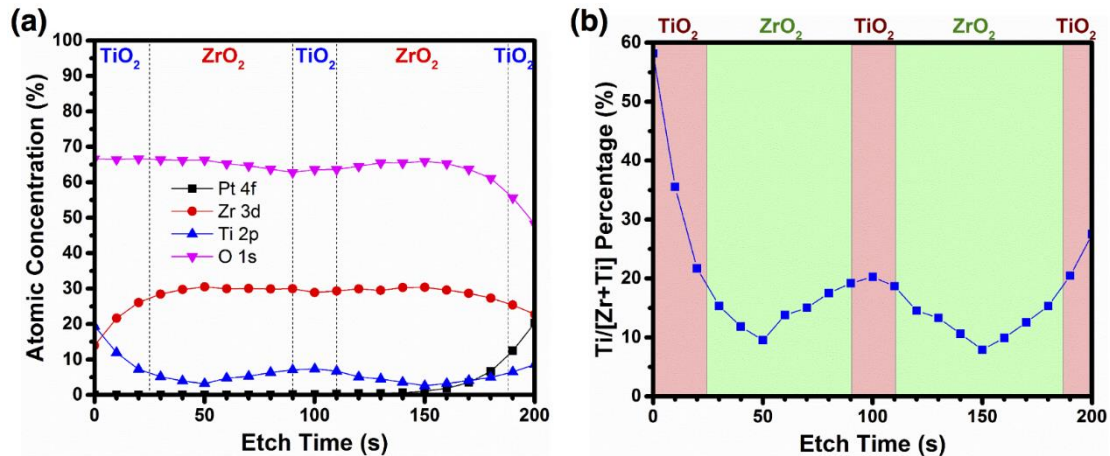

**Fig. S1** (a) XPS depth profiles of the elements (Zr, Ti, O, and Pt) and (b) the depth profile of the Ti/[Zr+Ti] percentage in the TZT2 sample.

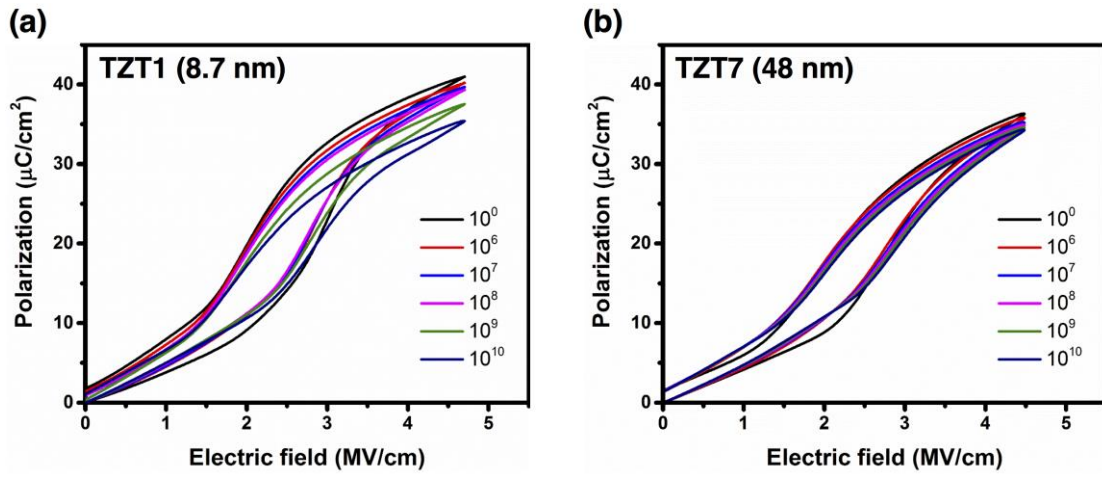

**Fig. S2** Evolution of the  $P$ - $E$  curves of the (a) TZT1 and (b) TZT7 capacitors with the fatigue cycling of unipolar rectangular pulses of 4.5 MV/cm at a frequency of 125 kHz.
